# Supplementary material for: The extract from the roots of Rose odorata sweet var. gigantean (Coll. et Hemsl.) Rehd. et Wils attenuates DSS-induced ulcerative colitis by regulating the Nrf2/NF-κB signaling pathways
Source: Royal Society of Chemistry journal article supplement (doi:10.1039/c9ra10747a), 2020-01-01
Supplement: c9ra10747a2.pdf [file c9ra10747a2.pdf]

# Rose odorata Sweet var. gigantea (Coll.et Hemsl.) Rehd. Et Wils extract attenuates DSS-induced ulcerative colitis by activating Nrf2/NF-κB pathway

Xinyu Li <sup>a, b 1</sup>, Rui Liu <sup>a 1</sup>, Yanmin Zhao <sup>a, b</sup>, Naying Gao <sup>b, c</sup>, Xin Jin <sup>b</sup>, Xiaoxia Gao <sup>c</sup>, Tan Li <sup>b \*</sup>,  
Dailin Liu <sup>a, b \*</sup>

<sup>a</sup> Tianjin University of Traditional Chinese Medicine, Tianjin 300193, China

<sup>b</sup> Tianjin Key Laboratory for Prevention and Control of Occupational and Environmental hazard,  
Logistics University of Chinese People's Armed Police Force, Tianjin 300309, P. R. China.

<sup>c</sup> Department of Traditional Chinese Medicine, Guangdong Pharmaceutical College, 510006,  
Guangdong, P. R. China

**Table S1** Standard curve equation and the contents of seven compounds in ROE

| Peaks | Reference Name                          | Standard curve equation | R <sup>2</sup> | Content (mg/g) |
|-------|-----------------------------------------|-------------------------|----------------|----------------|
| 1     | Procyanidin B3                          | y = 296220x - 4964.7    | 0.9996         | 16.22          |
| 2     | Epigallo catechin                       | y = 248534x - 5730.3    | 0.9999         | 5.60           |
| 3     | Catechin                                | y = 475346x + 69114     | 0.9994         | 8.50           |
| 4     | Epicatechin                             | y = 806963x + 273547    | 0.9996         | 2.35           |
| 5     | (-)-fisetinidol-(4α,8)-(-)-catechin     | y = 403500x + 168992    | 0.9995         | 3.22           |
| 6     | (4α,8)-(-)-fisetinidol- (-)-epicatechin | y = 1,187,747x + 62,281 | 0.9996         | 4.39           |
| 7     | (+)-guibourtinidol-(4β,8)-epicatechin   | y = 65786x + 611304     | 0.9994         | 1.12           |

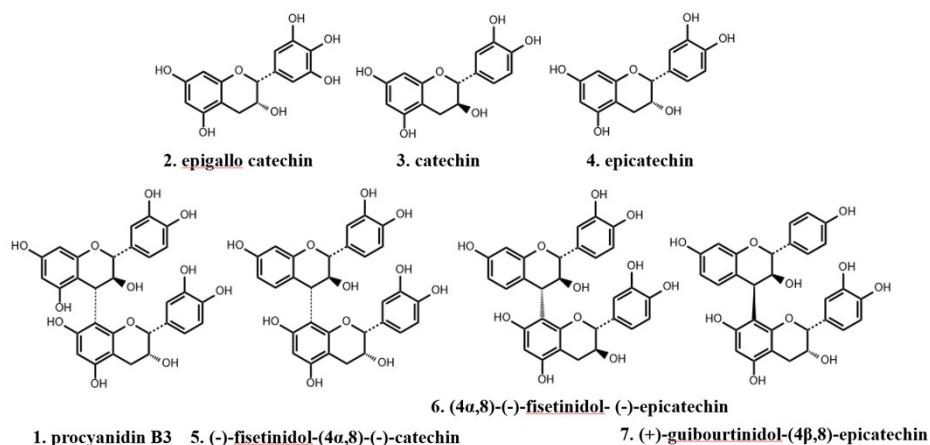

**Figure S1** the structures of seven identified peaks
